# Supplementary material for: An approach to uncover the relationship between 17b-estradiol and ESR1/ESR2 ratio in the regulation of canine corpus luteum
Source: Front Vet Sci. 2022 Aug 2;9:885257. doi: 10.3389/fvets.2022.885257 (PMC9378837; doi:10.3389/fvets.2022.885257)
Supplement: Supplementary file 2 [file Table_2.xlsx]

## Sheet: TFBS_ERb
Human Anchored Combination TFBS Cluster Analysis
Analysis Results
Selected Parameters
Job ID:	bRYBjMOYfE
Number of genes submitted for analysis:	3432
Number of genes included in analysis:	3227
Number of genes missing from analysis:	205
Number of unique oPOSSUM genes in analysis:	3227
TFBS profile matrix source:	JASPAR CORE profiles
Anchoring TF:	ESR2 (C17 - Zinc-coordinating::Hormone-nuclear Receptor)
Maximum Inter-Binding Distance:	100
Conservation cutoff:	0.4
Matrix score threshold:	0.85
Upstream sequence length:	5000
Downstream sequence length:	5000
Results returned:	All results sorted by Z-score
Target Genes
Analyzed:	A2M A4GALT AACS AADACL4 AAK1 AASS ABAT ABCA1 ABCA4 ABCA8 ABCA9 ABCB6 ABCC1 ABCG2 ABHD12B ABHD14A ABHD14B ABHD2 ABHD5 ABI3 ABI3BP ABLIM1 ABLIM3 ABTB1 ABTB2 ACAA1 ACACB ACADL ACADVL ACAP1 ACAT2 ACBD6 ACE2 ACER2 ACER3 ACLY ACO1 ACO2 ACOT7 ACOT9 ACOX1 ACSBG1 ACSF2 ACSL4 ACSM5 ACSS1 ACSS2 ACSS3 ACTG1 ACTN1 ACTR1A ACVR1B ACVRL1 ADA ADAM10 ADAM12 ADAM19 ADAM22 ADAM28 ADAM8 ADAMDEC1 ADAMTS1 ADAMTS10 ADAM…
Omitted:	CRYBG1 BEX3 PATJ ACKR3 ACKR1 ADGRE1 GCSAM RACK1 ADGRG1 P3H3 LARGE1 TESMIN PECAM1 PEG3 PLPP1 MOB4 PTPN20 NECTIN2 TUBB2A TUBB4A TENM2 TENM3 ADGRE5 VWA7 TANGO2 RSRP1 MELTF PLPP2 LURAP1L ELP5 CPQ CHP1 HACD3 P3H4 MSMO1 AAMDC SMIM4 HACD4 GSKIP TRIL BAIAP2L1 FAM210B UTP11 ZC2HC1A C1QTNF12 GPALPP1 TMEM35A TESPA1 ELOB MGARP RMDN3 SARAF PLPP3 NOP53 NT5C3B AREL1 CARMIL1 FUOM SVBP EMC10 CAMSAP3 PPP1R35 LYPD8…
Results - click column headers to sort by that column
Warning: The provided background set resulted in zero binding sites for one or more TF clusters. These cases are highlighted in red. In cases where there were also zero binding sites for the target set, the Z-score is undefined (NA). In cases where there were one or more binding sites in the target set, the Z-score is infinite (Inf). However, the result may or may not be considered significant. R…
TFBS cluster name	Target gene hits	Target gene non-hits	Background gene hits	Background gene non-hits	Target cluster hits	Target cluster nucleotide rate	Background cluster hits	Background cluster nucleotide rate	Z-score	Fisher score
C12 - Winged Helix-Turn-Helix::Forkhead	1243	1984	6643	18109	4668	0.0118	22648	0.0108	24.929	94.507
C57 - Winged Helix-Turn-Helix::Forkhead	1822	1405	10566	14186	14049	0.0244	70201	0.023	24.677	112.285
C55 - Winged Helix-Turn-Helix::Ets	2160	1067	12985	11767	26043	0.0342	131367	0.0326	23.955	126.605
C159 - Other Alpha-Helix::High Mobility Group	1543	1684	8692	16060	7732	0.0196	38346	0.0184	23.687	99.72
C113 - Helix-Turn-Helix::Homeo	2104	1123	12549	12203	31168	0.0381	157477	0.0364	23.488	125.798
C151 - Zipper-type::Leucine Zipper	347	2880	1569	23183	564	0.00133	2353	0.00105	22.565	41.264
C127 - Winged Helix-Turn-Helix::Ets	1546	1681	8750	16002	6276	0.0132	31349	0.0125	17.449	97.423
C41 - Other Alpha-Helix::High Mobility Group	1844	1383	10801	13951	13874	0.0204	70571	0.0195	17.328	107.933
C128 - Ig-fold::Rel	1836	1391	10417	14335	10661	0.0126	53209	0.0119	16.059	129.465
C16 - Ig-fold::Stat	999	2228	5075	19677	2206	0.00388	10617	0.00352	15.773	88.434
C104 - Zinc-coordinating::BetaBetaAlpha-zinc finger	1489	1738	7937	16815	7139	0.0105	35693	0.00992	15.019	124.958
C14 - Helix-Turn-Helix::Arid	1658	1569	9647	15105	12593	0.0111	63164	0.0105	14.568	92.893
C2 - Zinc-coordinating::GATA	1484	1743	8406	16346	6174	0.00998	30898	0.00944	14.393	90.837
C87 - Zinc-coordinating::BetaBetaAlpha-zinc finger	1384	1843	7564	17188	5145	0.00756	25589	0.00711	13.926	98.927
C29 - Zinc-coordinating::BetaBetaAlpha-zinc finger	702	2525	3465	21287	1473	0.00345	7131	0.00315	13.709	64.813
C132 - Beta-sheet::TATA-binding	904	2323	4900	19852	2466	0.00543	12178	0.00508	13.165	58.024
C118 - Helix-Turn-Helix::Homeo	1655	1572	9346	15406	7677	0.0102	38620	0.00966	13.146	110.471
C136 - Zipper-type::Helix-Loop-Helix	1393	1834	7615	17137	4699	0.0069	23400	0.0065	13.032	99.773
C84 - Zinc-coordinating::BetaBetaAlpha-zinc finger	878	2349	4720	20032	2502	0.00551	12390	0.00516	12.724	58.299
C142 - Zipper-type::Helix-Loop-Helix	1168	2059	6203	18549	3551	0.00522	17571	0.00488	12.522	89.312
C11 - Zipper-type::Leucine Zipper	1779	1448	10192	14560	9851	0.0105	49627	0.0101	12.329	115.535
C130 - Other Alpha-Helix::MADS	600	2627	2965	21787	1173	0.00172	5558	0.00154	11.885	54.02
C85 - Zinc-coordinating::BetaBetaAlpha-zinc finger	431	2796	2145	22607	718	0.00179	3413	0.00161	11.769	36.811
C50 - Zipper-type::Helix-Loop-Helix	1101	2126	5680	19072	2721	0.00673	13610	0.00637	11.525	94.008
C1 - Beta-sheet::TATA-binding	861	2366	4715	20037	2738	0.00644	13725	0.0061	11.194	51.896
C33 - Zinc-coordinating::BetaBetaAlpha-zinc finger	878	2349	4545	20207	1923	0.00425	9572	0.004	10.504	69.421
C169 - Helix-Turn-Helix::Homeo	746	2481	3825	20927	1578	0.00325	7769	0.00303	10.43	59.548
C75 - Zinc-coordinating::BetaBetaAlpha-zinc finger	2036	1191	11727	13025	21412	0.0286	110598	0.028	9.987	145.737
C134 - Winged Helix-Turn-Helix::IRF	715	2512	3751	21001	1479	0.00317	7279	0.00297	9.924	51.243
C160 - Other Alpha-Helix::High Mobility Group	743	2484	4014	20738	1803	0.00416	8964	0.00392	9.912	46.635
C112 - Zinc-coordinating::GATA	585	2642	3126	21626	1148	0.003	5666	0.0028	9.754	37.552
C46 - Beta-Hairpin-Ribbon::T	274	2953	1322	23430	406	0.000892	1912	0.000787	9.687	26.177
C15 - Helix-Turn-Helix::Arid	607	2620	3364	21388	1512	0.00311	7486	0.00291	9.573	32.594
C95 - Zinc-coordinating::BetaBetaAlpha-zinc finger	746	2481	3697	21055	1572	0.00277	7764	0.00259	9.372	68.467
C51 - Zipper-type::Helix-Loop-Helix	1087	2140	5695	19057	2880	0.00633	14569	0.00606	9.224	86.319
C114 - Helix-Turn-Helix::Homeo	631	2596	3059	21693	1120	0.00213	5476	0.00198	8.959	61.482
C38 - Zinc-coordinating::BetaBetaAlpha-zinc finger	555	2672	2825	21927	1012	0.00238	4994	0.00222	8.788	44.001
C107 - Other::CP2	1044	2183	5503	19249	2752	0.00566	13919	0.00541	8.734	79.628
C9 - Zipper-type::Leucine Zipper	1368	1859	7671	17081	5404	0.00779	27540	0.0075	8.611	84.866
C5 - Helix-Turn-Helix::Arid	337	2890	1658	23094	554	0.00138	2681	0.00127	8.595	29.915
C19 - Zinc-coordinating::Hormone-nuclear Receptor	823	2404	4201	20551	1765	0.00374	8876	0.00355	8.482	68.178
C94 - Zinc-coordinating::BetaBetaAlpha-zinc finger	487	2740	2511	22241	901	0.00199	4429	0.00185	8.479	36.206
C149 - Zipper-type::Leucine Zipper	290	2937	1408	23344	453	0.000998	2163	0.000902	8.405	27.059
C53 - Zinc-coordinating::Hormone-nuclear Receptor	979	2248	5192	19560	2457	0.00607	12451	0.00583	8.376	71.255
C54 - Zinc-coordinating::Hormone-nuclear Receptor	278	2949	1293	23459	391	0.000919	1865	0.000829	8.147	30.129
C144 - Zipper-type::Helix-Loop-Helix	518	2709	2630	22122	891	0.00236	4421	0.00221	8.052	41.265
C161 - Other Alpha-Helix::High Mobility Group	540	2687	2870	21882	1232	0.00294	6163	0.00278	7.958	35.31
C164 - Helix-Turn-Helix::Homeo	116	3111	582	24170	169	0.000422	775	0.000366	7.628	10.339
C102 - Zinc-coordinating::BetaBetaAlpha-zinc finger	129	3098	629	24123	187	0.000412	862	0.000359	7.262	12.527
C140 - Zipper-type::Helix-Loop-Helix	1412	1815	7923	16829	5405	0.00476	27464	0.00458	7.174	88.685
C146 - Unknown::	32	3195	127	24625	39	9.17e-05	155	6.89e-05	7.132	6.75
C68 - Zinc-coordinating::BetaBetaAlpha-zinc finger	600	2627	3072	21680	1088	0.00256	5462	0.00243	6.854	46.77
C138 - Zipper-type::Helix-Loop-Helix	494	2733	2416	22336	812	0.00143	4022	0.00134	6.444	45.476
C108 - Helix-Turn-Helix::Myb	1421	1806	7742	17010	4800	0.00564	24565	0.00546	6.405	104.58
C30 - Zinc-coordinating::BetaBetaAlpha-zinc finger	383	2844	1896	22856	644	0.00151	3202	0.00142	6.241	33.265
C17 - Zinc-coordinating::Hormone-nuclear Receptor	1255	1972	6773	17979	3564	0.00561	18318	0.00544	6.161	91.375
C66 - Zinc-coordinating::BetaBetaAlpha-zinc finger	1994	1233	11771	12981	18253	0.0165	94786	0.0162	5.684	119.921
C111 - Helix-Turn-Helix::Other::Homeo::Nuclear Factor I-CCAAT-binding	87	3140	383	24369	110	0.000226	504	0.000196	5.612	12.122
C20 - Zinc-coordinating::Hormone-nuclear Receptor	572	2655	2884	21868	1033	0.00106	5120	0.000996	5.493	47.296
C155 - Winged Helix-Turn-Helix::RFX	589	2638	2959	21793	975	0.00235	4972	0.00225	5.455	49.571
C31 - Zinc-coordinating::BetaBetaAlpha-zinc finger	66	3161	310	24442	89	0.000222	409	0.000193	5.446	7.995
C24 - Ig-fold::Runt	1427	1800	7836	16916	4874	0.00788	25176	0.0077	5.422	101.132
C4 - Winged Helix-Turn-Helix::IRF	495	2732	2567	22185	881	0.00161	4405	0.00153	5.386	35.932
C119 - Helix-Turn-Helix::Homeo	320	2907	1633	23119	530	0.000934	2621	0.000874	5.33	24.612
C70 - Zinc-coordinating::BetaBetaAlpha-zinc finger	1906	1321	11198	13554	14132	0.013	73449	0.0128	5.176	112.867
C129 - Other Alpha-Helix::MADS	65	3162	303	24449	85	0.00015	383	0.000128	5.097	8.071
C76 - Zinc-coordinating::BetaBetaAlpha-zinc finger	141	3086	659	24093	187	0.000385	899	0.00035	4.86	15.599
C123 - Helix-Turn-Helix::Homeo	1197	2030	6954	17798	5033	0.00518	25937	0.00504	4.826	56.863
C8 - Zipper-type::Leucine Zipper	468	2759	2426	22326	789	0.00139	3972	0.00132	4.772	33.924
C36 - Zinc-coordinating::BetaBetaAlpha-zinc finger	234	2993	1121	23631	345	0.000811	1711	0.000761	4.752	23.036
C26 - Zinc-coordinating::MH1	477	2750	2339	22413	741	0.00185	3762	0.00178	4.557	43.373
C165 - Helix-Turn-Helix::Homeo	206	3021	1016	23736	296	0.000739	1468	0.000693	4.536	18.398
C18 - Zinc-coordinating::Hormone-nuclear Receptor	203	3024	994	23758	272	0.00075	1358	0.000704	4.481	18.63
C7 - Zinc-coordinating::Loop-Sheet-Helix	1	3226	2	24750	1	2.94e-06	2	1.11e-06	4.339	1.179
C48 - Other Alpha-Helix::Sand	121	3106	617	24135	175	0.00036	848	0.00033	4.309	10.105
C153 - Zipper-type::Leucine Zipper	165	3062	834	23918	229	0.000471	1122	0.000436	4.306	13.701
C137 - Zipper-type::Helix-Loop-Helix	652	2575	3372	21380	1168	0.00206	5966	0.00199	4.088	49.15
C79 - Zinc-coordinating::BetaBetaAlpha-zinc finger	84	3143	389	24363	107	0.000314	518	0.000288	4.069	10.186
C65 - Zinc-coordinating::BetaBetaAlpha-zinc finger	497	2730	2475	22277	813	0.00131	4119	0.00126	4.033	42.684
C148 - Zipper-type::Leucine Zipper	321	2906	1616	23136	513	0.00113	2601	0.00108	3.675	26.075
C42 - Other Alpha-Helix::High Mobility Group	59	3168	265	24487	72	0.000169	343	0.000152	3.525	8.269
C27 - Zinc-coordinating::BetaBetaAlpha-zinc finger	729	2498	3995	20757	1547	0.00364	7999	0.00357	3.344	42.46
C73 - Zinc-coordinating::BetaBetaAlpha-zinc finger	181	3046	924	23828	244	0.000609	1227	0.00058	3.223	14.337
C39 - Zinc-coordinating::BetaBetaAlpha-zinc finger	161	3066	869	23883	234	0.00055	1174	0.000522	3.203	10.274
C32 - Zinc-coordinating::BetaBetaAlpha-zinc finger	107	3120	542	24210	152	0.000326	751	0.000305	3.097	9.33
C34 - Zinc-coordinating::BetaBetaAlpha-zinc finger	670	2557	3459	21293	1299	0.00305	6726	0.00299	3.018	51.079
C117 - Helix-Turn-Helix::Homeo	153	3074	730	24022	191	0.00048	957	0.000455	3.005	15.705
C143 - Zipper-type::Helix-Loop-Helix	982	2245	5176	19576	2301	0.00406	11962	0.00399	2.815	73.605
C167 - Helix-Turn-Helix::Homeo	426	2801	2222	22530	746	0.00153	3847	0.0015	2.551	29.941
C106 - Zinc-coordinating::BetaBetaAlpha-zinc finger	121	3106	567	24185	146	0.0003	731	0.000284	2.454	13.488
C10 - Zipper-type::Leucine Zipper	811	2416	4233	20519	1601	0.00188	8307	0.00185	2.13	60.794
C78 - Zinc-coordinating::BetaBetaAlpha-zinc finger	65	3162	335	24417	86	0.000215	430	0.000203	2.123	5.885
C23 - Other Alpha-Helix::NFY CCAAT-binding	402	2825	2074	22678	633	0.00149	3277	0.00146	2.12	29.575
C168 - Helix-Turn-Helix::Homeo	141	3086	747	24005	201	0.000502	1029	0.000486	1.878	9.92
C152 - Zipper-type::Leucine Zipper	232	2995	1226	23526	334	0.000794	1731	0.000774	1.824	15.619
C64 - Other::Other	600	2627	3165	21587	1079	0.00174	5618	0.00172	1.672	41.008
C135 - Zipper-type::Helix-Loop-Helix	1446	1781	7939	16813	5199	0.00686	27196	0.00681	1.556	103.291
C28 - Zinc-coordinating::BetaBetaAlpha-zinc finger	630	2597	3194	21558	1180	0.00284	6179	0.00281	1.305	51.466
C89 - Zinc-coordinating::BetaBetaAlpha-zinc finger	125	3102	680	24072	186	0.000465	962	0.000454	1.231	8.026
C150 - Zipper-type::Leucine Zipper	77	3150	409	24343	103	0.000242	530	0.000236	1.09	6.012
C80 - Zinc-coordinating::BetaBetaAlpha-zinc finger	96	3131	505	24247	127	0.000317	656	0.00031	1.074	7.418
C74 - Zinc-coordinating::BetaBetaAlpha-zinc finger	145	3082	766	23986	205	0.000514	1065	0.000506	0.929	10.28
C103 - Zinc-coordinating::BetaBetaAlpha-zinc finger	112	3115	564	24188	146	0.000429	761	0.000423	0.763	9.903
C58 - Other Alpha-Helix::MADS	298	2929	1525	23227	443	0.000911	2326	0.000905	0.543	22.689
C60 - Zinc-coordinating::Glial Cells Missing (GCM)	309	2918	1615	23137	454	0.00107	2388	0.00106	0.437	21.512
C92 - Zinc-coordinating::BetaBetaAlpha-zinc finger	146	3081	777	23975	216	0.000444	1133	0.000441	0.429	10.03
C59 - Zinc-coordinating::Glial Cells Missing (GCM)	192	3035	949	23803	253	0.000632	1330	0.000628	0.371	17.096
C166 - Helix-Turn-Helix::Homeo	107	3120	591	24161	151	0.000377	796	0.000376	0.142	6.634
C45 - Other Alpha-Helix::High Mobility Group	197	3030	1050	23702	291	0.000641	1537	0.000641	0.062	12.963
C105 - Zinc-coordinating::BetaBetaAlpha-zinc finger	8	3219	45	24707	10	3.09e-05	54	3.15e-05	-0.34	1.334
C13 - Beta-Hairpin-Ribbon::E2F T	214	3013	1194	23558	322	0.000757	1717	0.000763	-0.615	11.304
C35 - Zinc-coordinating::BetaBetaAlpha-zinc finger	120	3107	645	24107	159	0.000397	854	0.000403	-0.827	8.164
C109 - Helix-Turn-Helix::Myb	131	3096	692	24060	170	0.000425	915	0.000433	-1.005	9.43
C40 - Zinc-coordinating::BetaBetaAlpha-zinc finger	62	3165	353	24399	83	0.000195	453	0.000201	-1.17	3.91
C158 - Other Alpha-Helix::Sand	265	2962	1434	23318	377	0.000942	2038	0.000963	-1.782	15.898
C147 - Unknown::	48	3179	267	24485	60	0.000141	339	0.000151	-2.072	3.608
C56 - Winged Helix-Turn-Helix::Ets	10	3217	69	24683	16	4.23e-05	97	4.85e-05	-2.351	0.849
C25 - Zinc-coordinating::MH1	209	3018	1113	23639	291	0.000727	1591	0.000752	-2.363	13.726
C101 - Zinc-coordinating::BetaBetaAlpha-zinc finger	64	3163	366	24386	82	0.000193	463	0.000206	-2.394	3.922
C98 - Zinc-coordinating::BetaBetaAlpha-zinc finger	357	2870	1868	22884	569	0.00134	3091	0.00137	-2.589	24.683
C37 - Zinc-coordinating::BetaBetaAlpha-zinc finger	233	2994	1270	23482	345	0.000811	1907	0.000848	-3.309	13.646
C156 - Winged Helix-Turn-Helix::E2F	244	2983	1250	23502	317	0.000796	1760	0.000834	-3.495	18.642
C77 - Zinc-coordinating::BetaBetaAlpha-zinc finger	24	3203	146	24606	33	8.24e-05	204	9.64e-05	-3.725	1.754
C61 - Winged Helix-Turn-Helix::E2F	705	2522	3714	21038	1268	0.00149	6972	0.00155	-3.951	49.469
C110 - Helix-Turn-Helix::Myb	228	2999	1279	23473	324	0.000754	1813	0.000797	-4.013	11.644
C170 - Helix-Turn-Helix::Homeo	279	2948	1620	23132	430	0.00107	2444	0.00115	-6.192	11.621
C126 - Helix-Turn-Helix::Homeo	4	3223	31	24721	4	1.76e-05	37	3.08e-05	-6.242	0.534
C86 - Zinc-coordinating::BetaBetaAlpha-zinc finger	86	3141	498	24254	107	0.00022	665	0.000259	-6.276	4.559
C88 - Zinc-coordinating::BetaBetaAlpha-zinc finger	916	2311	4953	19799	2420	0.00498	13257	0.00516	-6.544	59.696
C72 - Zinc-coordinating::BetaBetaAlpha-zinc finger	1925	1302	11326	13426	13727	0.0127	74471	0.0131	-7.352	114.046
C157 - Winged Helix-Turn-Helix::E2F	78	3149	512	24240	98	0.000216	646	0.000269	-8.485	2.203
C62 - Winged Helix-Turn-Helix::E2F	92	3135	597	24155	115	0.000253	759	0.000316	-9.241	2.588
C133 - Winged Helix-Turn-Helix::IRF	129	3098	791	23961	164	0.000361	1075	0.000448	-10.69	4.531
C83 - Zinc-coordinating::BetaBetaAlpha-zinc finger	102	3125	676	24076	127	0.000187	908	0.000252	-10.808	2.388
C90 - Zinc-coordinating::BetaBetaAlpha-zinc finger	0	3227	0	24752	0	0	0	0	NA	0
C71 - Zinc-coordinating::BetaBetaAlpha-zinc finger	0	3227	0	24752	0	0	0	0	NA	0
C125 - Helix-Turn-Helix::Homeo	0	3227	0	24752	0	0	0	0	NA	0
C44 - Other Alpha-Helix::High Mobility Group	0	3227	0	24752	0	0	0	0	NA	0
C163 - Zinc-coordinating::DM	0	3227	0	24752	0	0	0	0	NA	0
C93 - Zinc-coordinating::BetaBetaAlpha-zinc finger	0	3227	0	24752	0	0	0	0	NA	0
C81 - Zinc-coordinating::BetaBetaAlpha-zinc finger	0	3227	0	24752	0	0	0	0	NA	0
C67 - Zinc-coordinating::BetaBetaAlpha-zinc finger	0	3227	0	24752	0	0	0	0	NA	0
C139 - Zipper-type::Helix-Loop-Helix	0	3227	0	24752	0	0	0	0	NA	0
C82 - Zinc-coordinating::BetaBetaAlpha-zinc finger	0	3227	0	24752	0	0	0	0	NA	0
C69 - Zinc-coordinating::BetaBetaAlpha-zinc finger	0	3227	0	24752	0	0	0	0	NA	0
C145 - Helix-Turn-Helix::Brinker	0	3227	0	24752	0	0	0	0	NA	0
C49 - Other Alpha-Helix::Sand	0	3227	0	24752	0	0	0	0	NA	0
C124 - Helix-Turn-Helix::Homeo	0	3227	0	24752	0	0	0	0	NA	0
C131 - Other::LAG1	0	3227	0	24752	0	0	0	0	NA	0
C121 - Helix-Turn-Helix::Homeo	0	3227	0	24752	0	0	0	0	NA	0
C154 - Helix-Turn-Helix::RFX	0	3227	0	24752	0	0	0	0	NA	0
C96 - Zinc-coordinating::BetaBetaAlpha-zinc finger	0	3227	0	24752	0	0	0	0	NA	0
C47 - Other Alpha-Helix::Sand	0	3227	0	24752	0	0	0	0	NA	0
C43 - Other Alpha-Helix::High Mobility Group	0	3227	0	24752	0	0	0	0	NA	0
C21 - Zinc-coordinating::Hormone-nuclear Receptor	0	3227	0	24752	0	0	0	0	NA	0
C63 - Other::Other	0	3227	0	24752	0	0	0	0	NA	0
C99 - Zinc-coordinating::BetaBetaAlpha-zinc finger	0	3227	0	24752	0	0	0	0	NA	0
C162 - Other Alpha-Helix::High Mobility Group	0	3227	0	24752	0	0	0	0	NA	0
C115 - Helix-Turn-Helix::Homeo	0	3227	0	24752	0	0	0	0	NA	0
C91 - Zinc-coordinating::BetaBetaAlpha-zinc finger	0	3227	0	24752	0	0	0	0	NA	0
C97 - Zinc-coordinating::BetaBetaAlpha-zinc finger	0	3227	0	24752	0	0	0	0	NA	0
C52 - Helix-Turn-Helix::Zeste	0	3227	0	24752	0	0	0	0	NA	0
C116 - Helix-Turn-Helix::Homeo	0	3227	0	24752	0	0	0	0	NA	0
C141 - Zipper-type::Helix-Loop-Helix	0	3227	0	24752	0	0	0	0	NA	0
C100 - Zinc-coordinating::BetaBetaAlpha-zinc finger	0	3227	0	24752	0	0	0	0	NA	0
C120 - Helix-Turn-Helix::Homeo	0	3227	0	24752	0	0	0	0	NA	0
C122 - Helix-Turn-Helix::Homeo	0	3227	0	24752	0	0	0	0	NA	0
C22 - Zinc-coordinating::Hormone-nuclear Receptor	0	3227	0	24752	0	0	0	0	NA	0
C6 - Other::AT-hook	0	3227	0	24752	0	0	0	0	NA	0
C3 - Zinc-coordinating::GATA	0	3227	0	24752	0	0	0	0	NA	0
Download as a tab delimited text file (results will be kept on the server for 14 days after analysis)
Consult the help file for an explanation of the column headings.
